# Supplementary material for: Synthesis and elucidation of strained galactopyronose esters as selective cyclooxygenase-2 inhibitor: a comprehensive computational approach
Source: Royal Society of Chemistry journal article supplement (doi:10.1039/d4ra03520h), 2024-01-01
Supplement: d4ra03520h1.pdf [file d4ra03520h1.pdf]

## Supplementary Information

### Synthesis and elucidation of strained galactopyranose esters as selective cyclooxygenase-2 inhibitor: A comprehensive computational approach

Mohammed Sakib Musa<sup>a</sup> , Md. Sapon Miah<sup>b</sup> , Yeasmin Akter Munni<sup>c</sup> , Md. Abdul Majed Patwary<sup>d</sup> , Mohsin Kazi<sup>e</sup> , Mohammed Mahbul Matin<sup>b</sup> 

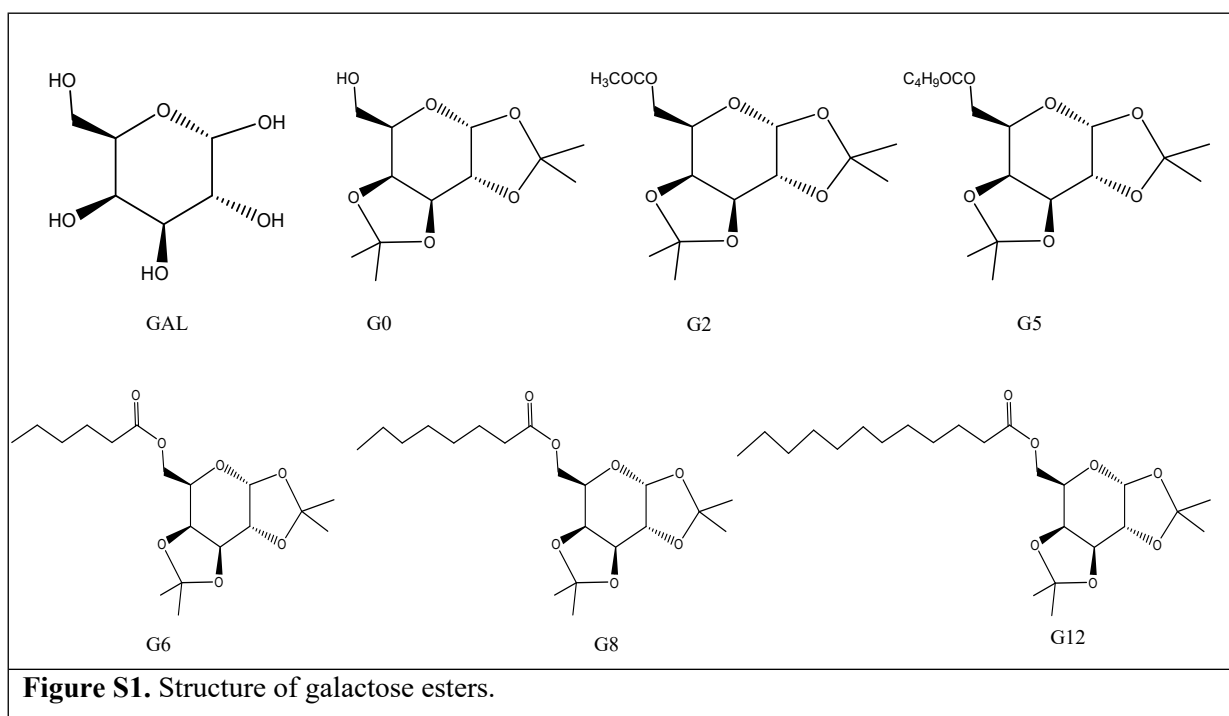

**Figure S1.** Structure of galactose esters.

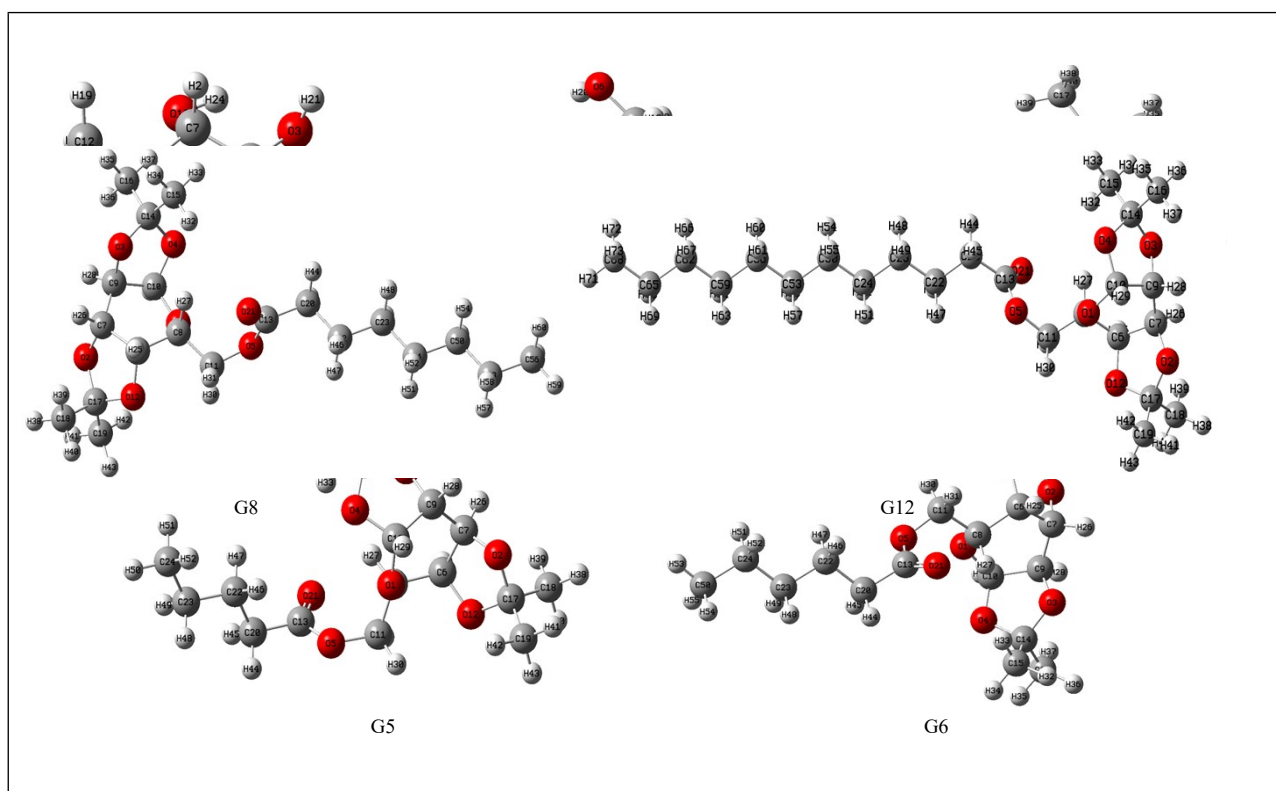

Figure S2. Optimized [DFT method under B2LYP/6-31g+(d,p)] structures of galactose esters.

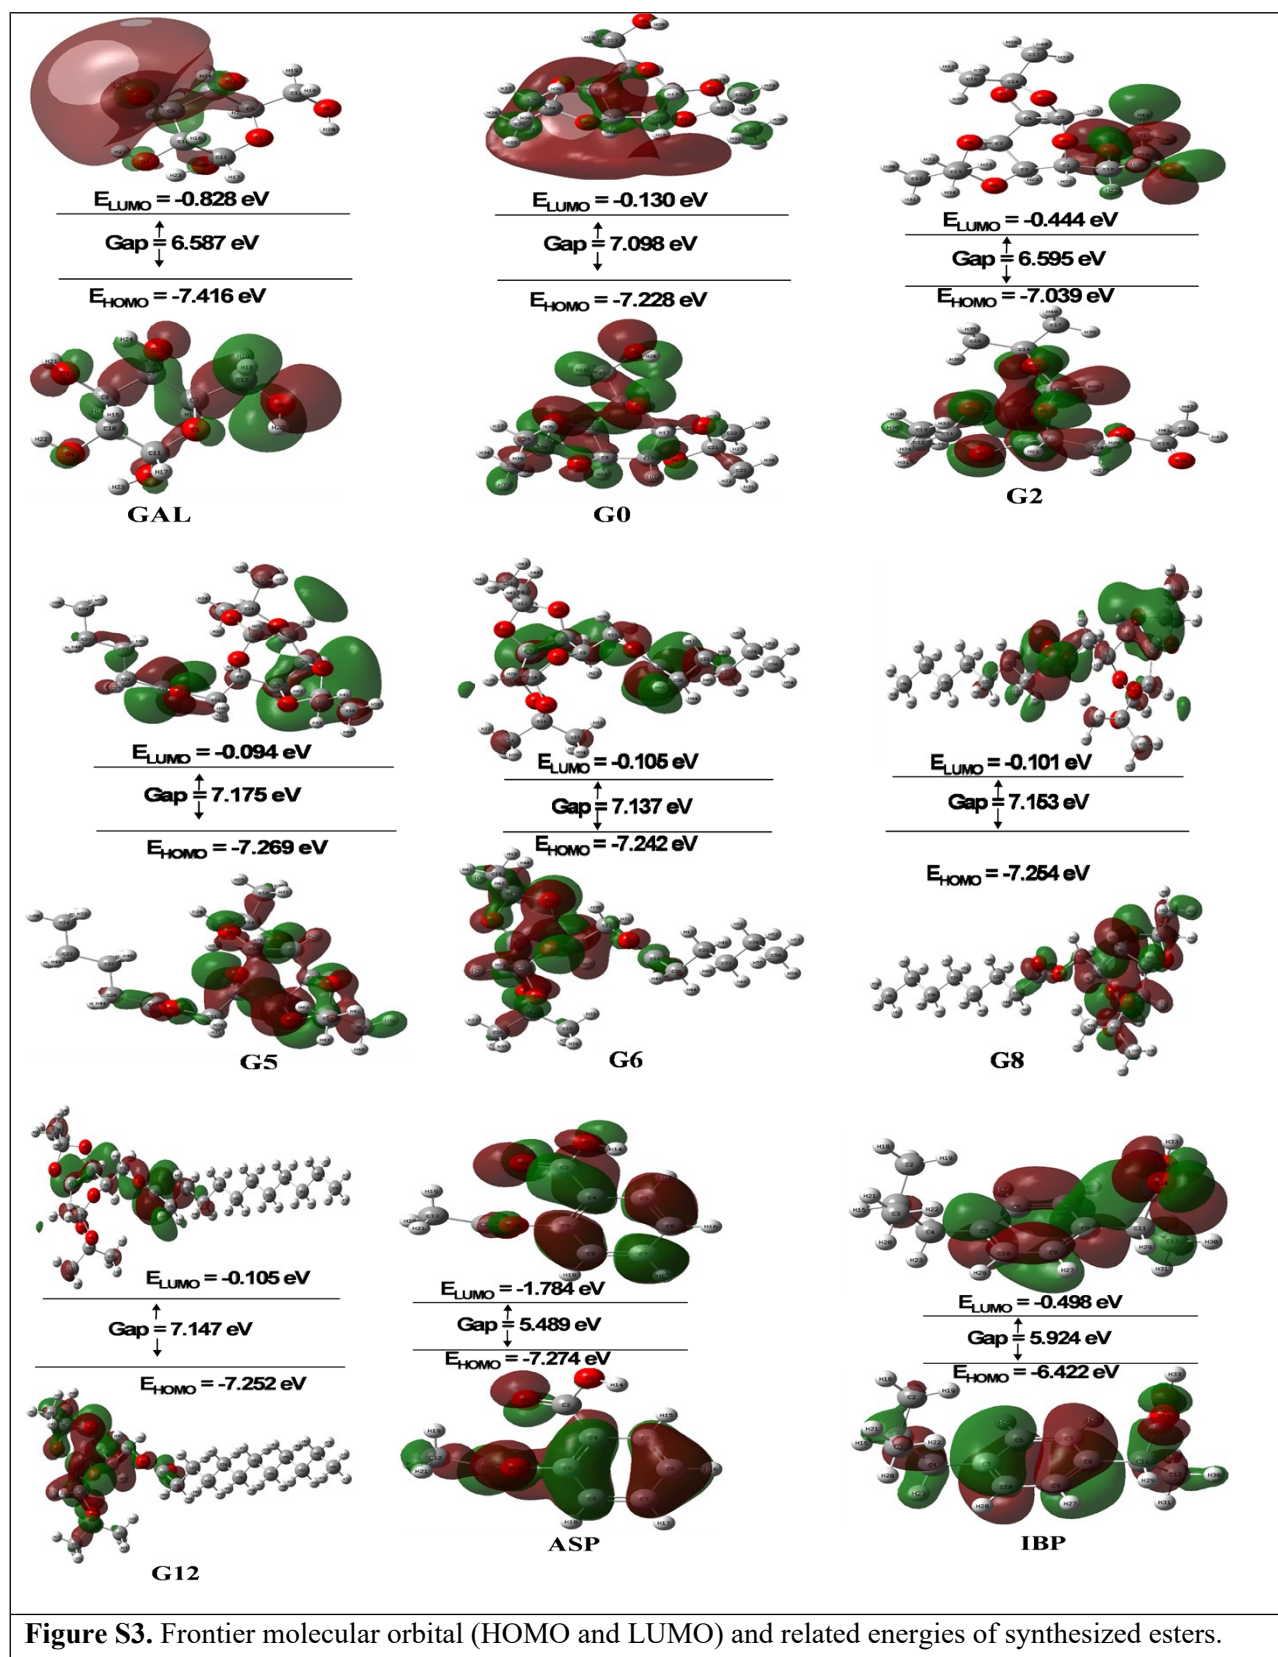

Figure S3. Frontier molecular orbital (HOMO and LUMO) and related energies of synthesized esters.

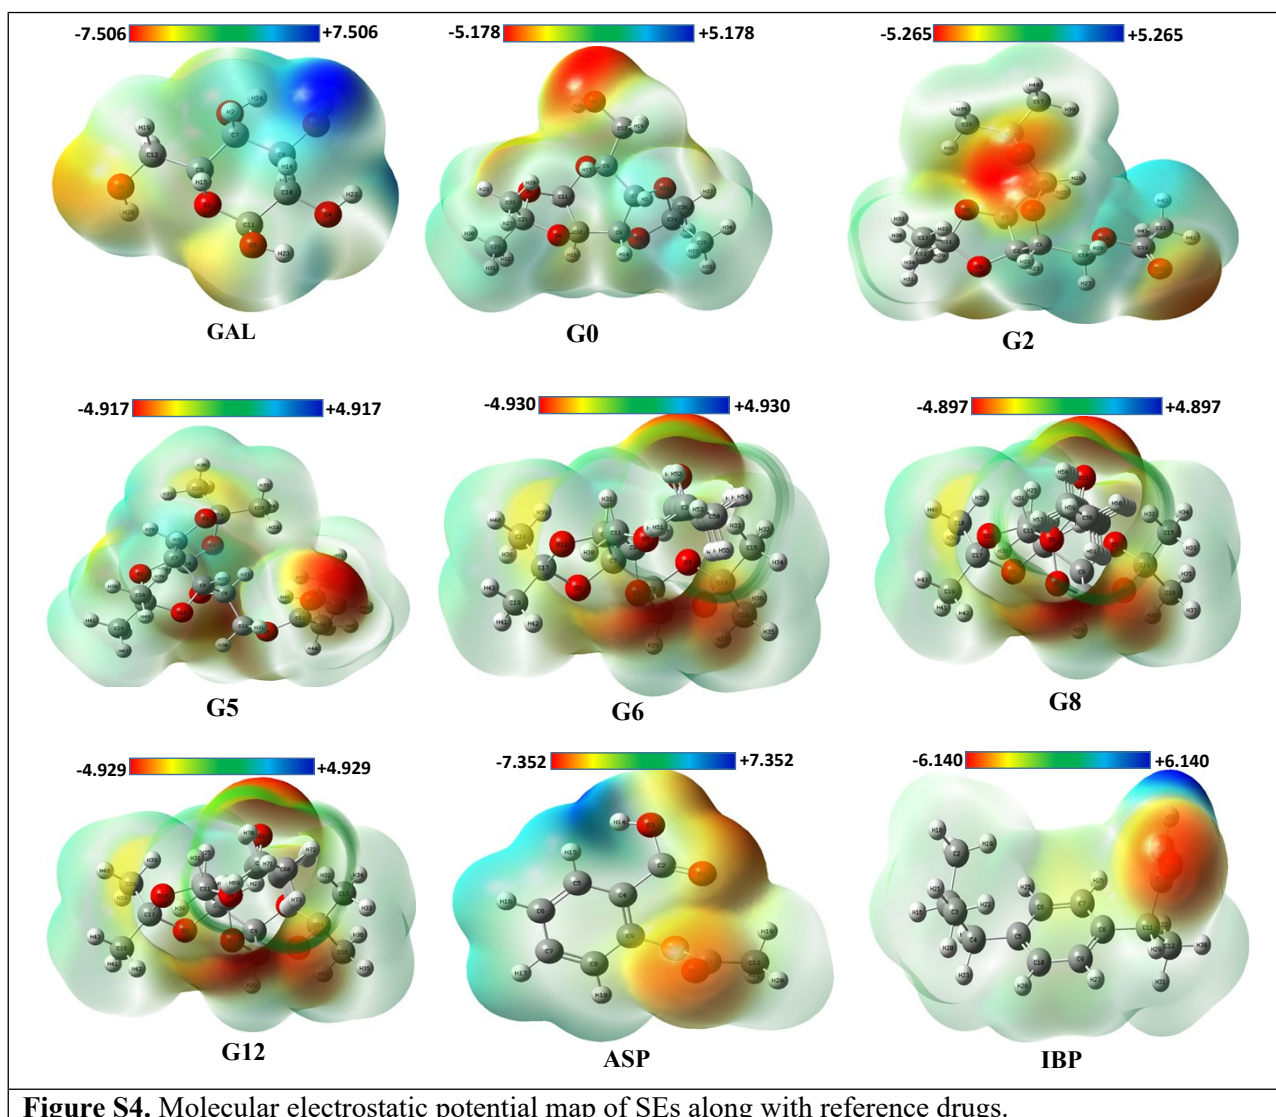

**Figure S4.** Molecular electrostatic potential map of SEs along with reference drugs.

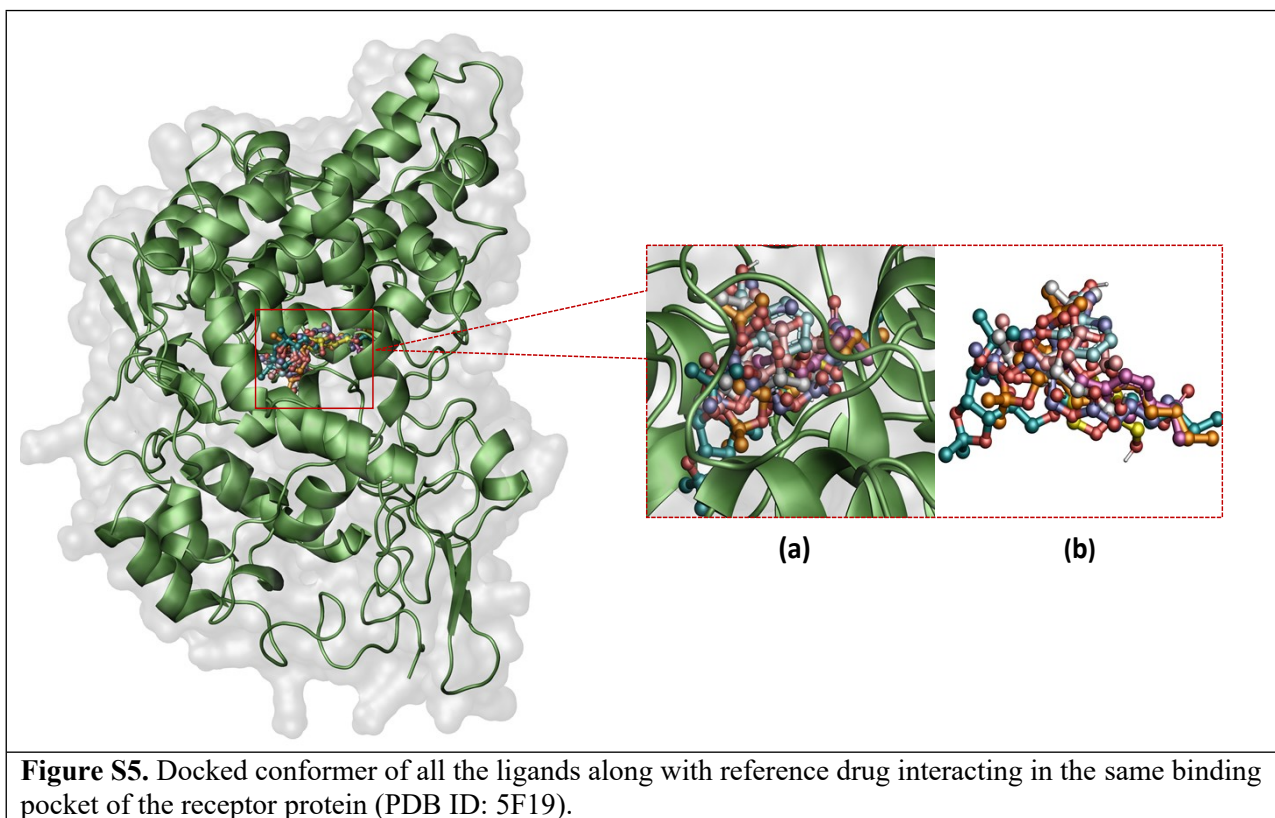

**Table S1.** Energy (eV) of HOMO-LUMO, gap, hardness ( $\eta$ ), softness ( $S$ ), chemical potential ( $\mu$ ), electronegativity ( $\chi$ ), and electrophilicity ( $\omega$ ) of SEs and standard drugs.

| Drug | eHOMO (H) | eLUMO (L) | Gap ( $\Delta E$ ) | Hardness ( $\eta$ ) | Softness (S) | Chemical potential ( $\mu$ ) | Electronegativity ( $\chi$ ) | Global electrophilicity index ( $\omega$ ) |
|------|-----------|-----------|--------------------|---------------------|--------------|------------------------------|------------------------------|--------------------------------------------|
| GAL  | -7.416    | -0.828    | 6.587              | 3.2935              | 0.3036       | -4.122                       | 4.1220                       | 2.579457                                   |
| G0   | -7.228    | -0.130    | 7.098              | 3.549               | 0.2818       | -3.679                       | 3.6790                       | 1.906881                                   |
| G2   | -7.039    | -0.444    | 6.595              | 3.2975              | 0.3033       | -3.742                       | 3.7415                       | 2.122642                                   |
| G5   | -7.269    | -0.094    | 7.175              | 3.5875              | 0.2787       | -3.682                       | 3.6815                       | 1.888981                                   |
| G6   | -7.242    | -0.105    | 7.137              | 3.5685              | 0.2802       | -3.674                       | 3.6735                       | 1.890795                                   |
| G8   | -7.254    | -0.101    | 7.153              | 3.5765              | 0.2796       | -3.678                       | 3.6775                       | 1.890676                                   |
| G12  | -7.252    | -0.105    | 7.147              | 3.5735              | 0.2798       | -3.679                       | 3.6785                       | 1.893293                                   |
| ASP  | -7.274    | -1.784    | 5.489              | 2.7445              | 0.3644       | -4.529                       | 4.5290                       | 3.736899                                   |
| IBP  | -6.422    | -0.498    | 5.924              | 2.9620              | 0.3376       | -3.460                       | 3.4600                       | 2.020864                                   |

**Table S2.** Binding affinity, nonbonding interactions of Galactose derivatives, and the standard drugs with the receptor, COX-2 (5F19).

| Name | Binding affinity (kcal/mol) | Residue in Contact | Bond distance (Å) | Interaction type | 2D diagram                                                                           |
|------|-----------------------------|--------------------|-------------------|------------------|--------------------------------------------------------------------------------------|
| GAL  | -6.7                        | LEU531             | 2.854             | H                | 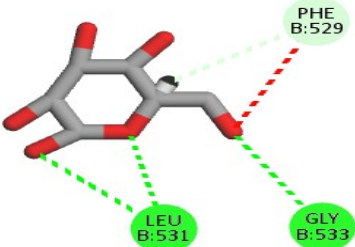 |
|      |                             | LEU531             | 1.945             | H                |                                                                                      |
|      |                             | GLY533             | 2.641             | H                |                                                                                      |
|      |                             | GLY533             | 2.975             | CH               |                                                                                      |
|      |                             | PHE529             | 2.305             | CH               |                                                                                      |
| G0   | -8.6                        | GLY526             | 2.974             | CH               |  |
|      |                             | LEU352             | 4.896             | A                |                                                                                      |
|      |                             | PHE205             | 5.109             | PA               |                                                                                      |
|      |                             | TYR348             | 4.458             | PA               |                                                                                      |
|      |                             | PHE381             | 4.806             | PA               |                                                                                      |
|      |                             | TYR385             | 5.302             | PA               |                                                                                      |
|      |                             | TRP387             | 5.060             | PA               |                                                                                      |
|      |                             | PHE518             | 4.336             | PA               |                                                                                      |
| G2   | -9.7                        | GLY526             | 2.748             | CH               |  |
|      |                             | ALA527             | 4.210             | A                |                                                                                      |
|      |                             | VAL523             | 3.953             | A                |                                                                                      |
|      |                             | LEU352             | 4.003             | A                |                                                                                      |
|      |                             | LEU384             | 5.096             | A                |                                                                                      |

|    |       |        |       |    |  |
|----|-------|--------|-------|----|--|
|    |       | LEU384 | 5.331 | A  |  |
|    |       | PHE381 | 3.775 | PA |  |
|    |       | TYR385 | 5.038 | PA |  |
|    |       | TRP387 | 4.757 | PA |  |
|    |       | TRP387 | 4.890 | PA |  |
|    |       | TRP387 | 4.648 | PA |  |
|    |       | PHE518 | 4.235 | PA |  |
| G5 | -9.7  | ALA527 | 3.697 | A  |  |
|    |       | LEU352 | 4.169 | A  |  |
|    |       | VAL523 | 4.353 | A  |  |
|    |       | VAL523 | 3.788 | A  |  |
|    |       | LEU534 | 4.163 | A  |  |
|    |       | PHE205 | 5.459 | PA |  |
|    |       | PHE381 | 4.418 | PA |  |
|    |       | PHE381 | 3.988 | PA |  |
|    |       | TYR385 | 4.180 | PA |  |
|    |       | TYR385 | 5.038 | PA |  |
|    |       | PHE518 | 4.573 | PA |  |
| G6 | -10.1 | VAL523 | 2.702 | CH |  |
|    |       | GLY526 | 2.448 | CH |  |
|    |       | ALA527 | 2.261 | CH |  |
|    |       | MET522 | 2.633 | CH |  |
|    |       | VAL349 | 3.757 | A  |  |
|    |       | LEU531 | 4.731 | A  |  |
|    |       | LEU534 | 5.025 | A  |  |
|    |       | VAL523 | 3.425 | A  |  |
|    |       | LEU352 | 3.965 | A  |  |
|    |       | VAL523 | 4.656 | A  |  |
|    |       | TYR348 | 5.061 | PA |  |
|    |       | TYR355 | 5.487 | PA |  |
|    |       | TYR385 | 4.656 | PA |  |
| G8 | -10.4 | VAL523 | 2.445 | CH |  |
|    |       | ALA527 | 3.034 | A  |  |
|    |       | LEU352 | 4.079 | A  |  |
|    |       | MET522 | 5.265 | A  |  |
|    |       | VAL523 | 4.179 | A  |  |
|    |       | LEU531 | 5.425 | A  |  |
|    |       | LEU534 | 4.527 | A  |  |
|    |       | VAL228 | 4.931 | A  |  |
|    |       | LEU534 | 4.946 | A  |  |
|    |       | PHE209 | 4.487 | PA |  |
|    |       | TYR355 | 4.221 | PA |  |
|    |       | PHE381 | 5.141 | PA |  |
|    |       | TRP387 | 4.308 | PA |  |
|    |       | PHE518 | 4.442 | PA |  |

|     |      |        |       |       |                                                                                     |
|-----|------|--------|-------|-------|-------------------------------------------------------------------------------------|
|     |      | PHE518 | 3.582 | PA    |                                                                                     |
| G10 | -8.8 |        |       |       |                                                                                     |
| G12 | -2.3 |        |       |       |                                                                                     |
| ASP | -7.4 | PHE381 | 2.661 | H     | 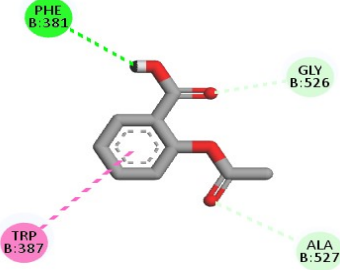  |
|     |      | GLY526 | 2.565 | CH    |                                                                                     |
|     |      | ALA527 | 2.828 | CH    |                                                                                     |
|     |      | TRP387 | 5.077 | PPTsh |                                                                                     |
| IBP | -9   | PHE529 | 2.158 | H     |   |
|     |      | PHE381 | 5.128 | PPTsh |                                                                                     |
|     |      | VAL228 | 4.877 | A     |                                                                                     |
|     |      | LEU534 | 3.972 | A     |                                                                                     |
|     |      | PHE205 | 5.148 | PA    |                                                                                     |
|     |      | LEU534 | 5.235 | PA    |                                                                                     |
| Rxb | -9.4 | MET522 | 1.930 | CH    |  |
|     |      | PHE518 | 5.581 | PPTsh |                                                                                     |
|     |      | LEU352 | 5.281 | PA    |                                                                                     |
|     |      | VAL523 | 4.574 | PA    |                                                                                     |
|     |      | ALA527 | 4.898 | PA    |                                                                                     |
|     |      | -      | -     | -     |                                                                                     |

H = Conventional hydrogen bond, CH = Carbon Hydrogen Bond, A = Alkyl, PA = Pi-Alkyl, PS = Pi-sigma, PPTsh = Pi-Pi T-shaped.

### Field-based 3D-QSAR model for pKi prediction

A QSAR model quantitatively assesses the relationship between the molecular structures of a series of compounds and their corresponding biological activities. The 3D-QSAR method operates under the assumption that compounds exhibiting structural or physicochemical similarities are likely to demonstrate similar biological activities. A collection of 22 structurally diverse COX-1 inhibitors, with inhibition constant ( $K_i$ ) values spanning from 7 to 9300 nM, was obtained from the BindingDB database<sup>1-10</sup> (Table S3). Additionally, 25 COX-2 inhibitors, exhibiting a broad spectrum of biological activity with  $K_i$  values ranging between 3 and 14,790 nM, were also compiled (Table S5). The structures of the molecules were processed using the LigPrep module of Maestro Version 12.5.139 with the following parameters: (i) the OPLS3e force field was applied (ii) the ionization state was neutral (iii) chiralities were determined from 3D structure and (iv) one low energy conformer per ligand per ligand was generated. Alignment of molecules is

the most essential input for creating a highly predictive field-based 3D-QSAR model.<sup>1-10</sup> Hence all the LigPrep output molecules were subjected to flexible ligand alignment. Alignment procedure was carried out separately for COX-1 and COX-2 inhibitors aiming to develop two field based 3D-QSAR model. During flexible ligand alignment reference structure was chosen automatically. Thorough sampling method was adopted with the maximum number of conformers of 1000 and nonbonded close contact distance of 0.5 Å. Two field-based 3D-QSAR models were developed using aligned molecular structures. Both datasets demonstrate diversity in their pharmacological and structural properties. The Ki values (nM) were converted to pKi using the standard conversion formula:  $pKi = -\log(10^{-9} \times Ki)$ . Each dataset was randomly partitioned into a training set (70%) and a test set (30%), with a partial least squares (PLS) factor of 3 applied. The random selection performed by the software was subsequently verified through visual inspection to ensure that the training and test sets maintained diversity. In this study, interaction energy calculations for the 3D QSAR model were conducted utilizing five different fields such as steric, electrostatic, hydrophobic, hydrogen bond donor (HBD), and hydrogen bond acceptor (HBA). These calculations were performed using Gaussian equations to evaluate the respective fields.<sup>8-12</sup> The optimal model was chosen based on its statistical robustness. Validation was conducted using test set comprising 30% compounds of the both dataset. Key parameters for evaluating the test set included RMSE,  $Q^2$ , and Pearson's r (Table S7, S9), which collectively reflect the model's predictive accuracy. To prevent overfitting, the number of PLS factors was carefully limited to 3. Additionally, scatter plots were generated to illustrate the correlation between the observed and predicted activities of the dataset molecules (Figure S6).

**Table S3** Dataset-1 for QSAR model of COX-1 inhibition



| BindingDB MonomerID | IUPAC name                                                                                             | Ki (nM) | pKi   | Reference |
|---------------------|--------------------------------------------------------------------------------------------------------|---------|-------|-----------|
| 11639               | 4-(5-(p-tolyl)-3-(trifluoromethyl)-1H-pyrazol-1-yl)benzenesulfonamide                                  | 1200    | 5.921 | [1]       |
| 13063               | 4-(5-methyl-3-phenylisoxazol-4-yl)benzenesulfonamide                                                   | 250     | 6.602 | [2]       |
| 22369               | 4-(4-(methylsulfonyl)phenyl)-3-phenylfuran-2(5H)-one                                                   | 5300    | 5.276 | [3]       |
| 50295287            | 2-(1-methyl-5-(4-methylbenzoyl)-1H-pyrrol-2-yl)acetic acid                                             | 1080    | 5.967 | [4]       |
| 50027952            | 2-(5-(4-chlorobenzoyl)-1,4-dimethyl-1H-pyrrol-2-yl)acetic acid                                         | 430     | 6.367 | [1]       |
| 50090676            | 2-(4-(thiophene-2-carbonyl)phenyl)propanoic acid                                                       | 1100    | 5.959 | [1]       |
| 50074922            | 2-(2-fluoro-[1,1'-biphenyl]-4-yl)propanoic acid                                                        | 410     | 6.387 | [5]       |
| 85514               | 2-((3-(trifluoromethyl)phenyl)amino)benzoate                                                           | 3000    | 5.523 | [1]       |
| 50009859            | 2-(4-isobutylphenyl)propanoic acid                                                                     | 4800    | 5.319 | [6]       |
| 17638               | 2-(1-(4-chlorobenzoyl)-5-methoxy-2-methyl-1H-indol-3-yl)acetic acid                                    | 190     | 6.721 | [7]       |
| 50022271            | 2-(3-benzoylphenyl)propanoic acid                                                                      | 47      | 7.328 | [1]       |
| 85512               | 4-isopropyl-2-(4-methoxyphenyl)-1H-naphtho[1,2-d]imidazole                                             | 7600    | 5.119 | [1]       |
| 50056998            | (Z)-4-hydroxy-2-methyl-N-(5-methylthiazol-2-yl)-2H-benzo[e][1,2]thiazine-3-carbimidic acid 1,1-dioxide | 5700    | 5.244 | [1]       |
| 50056999            | N-(4-nitro-2-phenoxyphenyl)methanesulfonamide                                                          | 4100    | 5.387 | [6]       |
| 22360               | 2-acetoxybenzoic acid                                                                                  | 4450    | 5.352 | 8         |
| 50009860            | 2-(6-methoxynaphthalen-2-yl)propanoic acid                                                             | 9300    | 5.032 | 1         |
| 50331888            | 5-chloro-2-hydroxy-3-(thiophene-2-carbonyl)-1H-indole-1-carbimidic acid                                | 81      | 7.092 | 1         |
| 50134036            | 2-((2,3-dimethylphenyl)amino)benzoic acid                                                              | 1940    | 5.712 | 8         |
| 54705               | 2-(3-phenoxyphenyl)propanoic acid                                                                      | 2730    | 5.564 | 8         |
| 50097346            | 2-(6-chloro-9H-carbazol-2-yl)propanoic acid                                                            | 87      | 7.060 | 1         |

|          |                                                                      |      |       |   |
|----------|----------------------------------------------------------------------|------|-------|---|
| 50174201 | 2-(2-((2,6-dichlorophenyl)amino)phenyl)acetate                       | 7    | 8.155 | 6 |
| 50016799 | 2-(1,8-diethyl-1,3,4,9-tetrahydropyrano[3,4-b]indol-1-yl)acetic acid | 1200 | 5.921 | 6 |

**Table S4** QSAR study of Dataset-1

| Ligand Name | QSAR Set | Activity (pKi) | PLS Factors | Predicted Activity | Prediction Error |
|-------------|----------|----------------|-------------|--------------------|------------------|
|             |          |                | 1           | 6.68048            | 0.759661         |
| 11639       | test     | 5.921          | 2           | 6.56598            | 0.645162         |
|             |          |                | 3           | 6.75655            | 0.835734         |
|             |          |                | 1           | 6.72904            | 0.12698          |
| 13063       | training | 6.602          | 2           | 6.66233            | 0.060271         |
|             |          |                | 3           | 6.86074            | 0.258685         |
|             |          |                | 1           | 6.35229            | 1.07657          |
| 22369       | test     | 5.276          | 2           | 6.42641            | 1.15069          |
|             |          |                | 3           | 6.65428            | 1.37855          |
|             |          |                | 1           | 6.27645            | 0.309873         |
| 50295287    | training | 5.967          | 2           | 6.49692            | 0.530347         |
|             |          |                | 3           | 6.21237            | 0.245799         |
|             |          |                | 1           | 6.37389            | 0.00736          |
| 50027952    | test     | 6.367          | 2           | 6.66216            | 0.295633         |
|             |          |                | 3           | 6.39338            | 0.026845         |
|             |          |                | 1           | 6.17413            | 0.215522         |
| 50090676    | training | 5.959          | 2           | 5.93978            | -0.01882         |
|             |          |                | 3           | 5.67707            | -0.28154         |
|             |          |                | 1           | 5.95501            | -0.43221         |
| 50074922    | training | 6.387          | 2           | 5.8935             | -0.49372         |
|             |          |                | 3           | 5.98445            | -0.40277         |
|             |          |                | 1           | 6.22665            | 0.703771         |
| 85514       | test     | 5.523          | 2           | 5.72719            | 0.204312         |
|             |          |                | 3           | 5.74082            | 0.217946         |
| 50009859    | training | 5.319          | 1           | 5.91738            | 0.59862          |

|          |          |       |   |         |          |
|----------|----------|-------|---|---------|----------|
|          |          |       | 2 | 5.63558 | 0.316821 |
|          |          |       | 3 | 5.70458 | 0.38582  |
| 17638    | training | 6.721 | 1 | 6.36328 | -0.35797 |
|          |          |       | 2 | 6.7427  | 0.021449 |
|          |          |       | 3 | 6.45498 | -0.26626 |
| 50022271 | training | 7.328 | 1 | 6.63582 | -0.69208 |
|          |          |       | 2 | 6.62631 | -0.70159 |
|          |          |       | 3 | 6.8851  | -0.4428  |
| 85512    | training | 5.119 | 1 | 5.80526 | 0.686076 |
|          |          |       | 2 | 5.01711 | -0.10208 |
|          |          |       | 3 | 4.90771 | -0.21147 |
| 50056998 | training | 5.244 | 1 | 4.36267 | -0.88146 |
|          |          |       | 2 | 5.15413 | -0.08999 |
|          |          |       | 3 | 5.32789 | 0.083767 |
| 50056999 | training | 5.387 | 1 | 6.01241 | 0.625195 |
|          |          |       | 2 | 5.51257 | 0.125353 |
|          |          |       | 3 | 5.52255 | 0.135336 |
| 22360    | training | 5.352 | 1 | 5.3854  | 0.033756 |
|          |          |       | 2 | 5.36121 | 0.009569 |
|          |          |       | 3 | 5.36694 | 0.015298 |
| 50009860 | test     | 5.032 | 1 | 5.59785 | 0.566328 |
|          |          |       | 2 | 5.17746 | 0.145943 |
|          |          |       | 3 | 4.9973  | -0.03422 |
| 50331888 | training | 7.092 | 1 | 6.77444 | -0.31708 |
|          |          |       | 2 | 7.58131 | 0.489791 |
|          |          |       | 3 | 7.30359 | 0.212074 |
| 50134036 | training | 5.712 | 1 | 6.30049 | 0.588292 |
|          |          |       | 2 | 5.85864 | 0.146438 |
|          |          |       | 3 | 5.90568 | 0.193479 |
| 54705    | training | 5.564 | 1 | 6.3169  | 0.753063 |
|          |          |       | 2 | 5.73069 | 0.16685  |
|          |          |       | 3 | 5.78964 | 0.225805 |

|          |          |       |   |         |          |
|----------|----------|-------|---|---------|----------|
|          |          |       | 1 | 6.26494 | -0.79554 |
| 50097346 | test     | 7.06  | 2 | 6.44114 | -0.61934 |
|          |          |       | 3 | 6.44349 | -0.61699 |
| 50174201 | training | 8.155 | 1 | 7.13596 | -1.01894 |
|          |          |       | 2 | 7.79004 | -0.36486 |
|          |          |       | 3 | 8.11798 | -0.03693 |
| 50016799 | training | 5.921 | 1 | 5.68317 | -0.23765 |
|          |          |       | 2 | 5.82499 | -0.09582 |
|          |          |       | 3 | 5.80653 | -0.11429 |

**Table S5** Dataset-2 for QSAR model of COX-2 inhibition

| BindingDB MonomerID | IUPAC name                                                                                                         | Ki (nM) | pKi      | References |
|---------------------|--------------------------------------------------------------------------------------------------------------------|---------|----------|------------|
| 50056999            | N-(4- <i>itro</i> -2-phenoxyphenyl)methanesulfonamide                                                              | 560     | 6.251812 | 6          |
| 50029593            | N-(2-(cyclohexyloxy)-4-nitrophenyl)methanesulfonamide                                                              | 350     | 6.455932 | 1          |
| 11639               | 4-(5-( <i>p</i> -tolyl)-3-(trifluoromethyl)-1H-pyrazol-1-yl)benzenesulfonamide                                     | 830     | 6.080922 | 1          |
| 50029616            | 5-(4-fluorophenyl)-1-(4-(methylsulfonyl)phenyl)-3-(trifluoromethyl)-1H-pyrazole                                    | 2000    | 5.69897  | 1          |
| 50072064            | 5-chloro-6'-methyl-3-(4-(methylsulfonyl)phenyl)-2,3'-bipyridine                                                    | 69      | 7.161151 | 9          |
| 13063               | 4-(5-methyl-3-phenylisoxazol-4-yl)benzenesulfonamide                                                               | 870     | 6.060481 | 6          |
| 50285227            | 2-(4-fluorophenyl)-3-(4-(methylsulfonyl)phenyl)thiophene                                                           | 250     | 6.60206  | 10         |
| 50566911            | 1-((5-(hydroxymethyl)-3-(4-(methylsulfonyl)phenyl)-6-(3,3,3-trifluoropropoxy)pyridin-2-yl)oxy)-2-methylpropan-2-ol | 32      | 7.49485  | 9          |
| 50566912            | 1-((5-(hydroxymethyl)-3-(4-(methylsulfonyl)phenyl)-6-(4,4,4-trifluorobutoxy)pyridin-2-yl)oxy)-2-methylpropan-2-ol  | 12      | 7.920819 | 9          |
| 50566900            | 1-((5-(hydroxymethyl)-3-(4-(methylsulfonyl)phenyl)-6-propoxy)pyridin-2-yl)oxy)-2-methylpropan-2-ol                 | 114     | 6.943095 | 9          |
| 50566901            | 1-((6-butoxy-5-(hydroxymethyl)-3-(4-(methylsulfonyl)phenyl)pyridin-2-yl)oxy)-2-methylpropan-2-ol                   | 12      | 7.920819 | 9          |
| 50566910            | 1-(((6-butoxy-5-(hydroxymethyl)-3-(4-(methylsulfonyl)phenyl)pyridin-2-                                             | 3       | 8.522879 | 9          |

|          |                                                                                                   |       |          |    |  |
|----------|---------------------------------------------------------------------------------------------------|-------|----------|----|--|
|          | yl)oxy)methyl)cyclobutan-1-ol                                                                     |       |          |    |  |
| 22369    | 4-(4-(methylsulfonyl)phenyl)-3-phenylfuran-2(5H)-one                                              | 530   | 6.275724 | 6  |  |
| 50566913 | 6'-butoxy-2'-(2-hydroxy-2-methylpropoxy)-5'-(hydroxymethyl)-[2,3'-bipyridine]-5-sulfonamide       | 19    | 7.721246 | 9  |  |
| 50114414 | 2-((5-(4-aminophenyl)-1,3,4-oxadiazol-2-yl)methyl)-5,6-diphenyl-1,2,4-triazin-3(2H)-one           | 14620 | 4.835053 | 10 |  |
| 50114416 | 2-((5-(4-methoxyphenyl)-1,3,4-oxadiazol-2-yl)methyl)-5,6-diphenyl-1,2,4-triazin-3(2H)-one         | 14750 | 4.831208 | 10 |  |
| 50114415 | 2-((5-(4-chlorophenyl)-1,3,4-oxadiazol-2-yl)methyl)-5,6-diphenyl-1,2,4-triazin-3(2H)-one          | 14710 | 4.832387 | 10 |  |
| 50114417 | 2-((5-(4-nitrophenyl)-1,3,4-oxadiazol-2-yl)methyl)-5,6-diphenyl-1,2,4-triazin-3(2H)-one           | 14790 | 4.830032 | 10 |  |
| 198171   | 2-((5-((4-methoxyphenyl)amino)-1,3,4-oxadiazol-2-yl)methyl)-5,6-diphenyl-1,2,4-triazin-3(2H)-one  | 650   | 6.187087 | 11 |  |
| 198174   | 2-((5-((4-methoxyphenyl)amino)-1,3,4-thiadiazol-2-yl)methyl)-5,6-diphenyl-1,2,4-triazin-3(2H)-one | 770   | 6.113509 | 11 |  |
| 198172   | 2-((5-((4-chlorophenyl)amino)-1,3,4-oxadiazol-2-yl)methyl)-5,6-diphenyl-1,2,4-triazin-3(2H)-one   | 630   | 6.200659 | 11 |  |
| 198173   | 2-((5-((4-nitrophenyl)amino)-1,3,4-oxadiazol-2-yl)methyl)-5,6-diphenyl-1,2,4-triazin-3(2H)-one    | 500   | 6.30103  | 11 |  |
| 198175   | 2-((5-((4-chlorophenyl)amino)-1,3,4-thiadiazol-2-yl)methyl)-5,6-diphenyl-1,2,4-triazin-3(2H)-one  | 960   | 6.017729 | 11 |  |
| 198176   | 2-((5-((4-nitrophenyl)amino)-1,3,4-thiadiazol-2-yl)methyl)-5,6-diphenyl-1,2,4-triazin-3(2H)-one   | 880   | 6.055517 | 11 |  |
| 50114413 | 2-((5-(2,4-dihydroxyphenyl)-1,3,4-oxadiazol-2-yl)methyl)-5,6-diphenyl-1,2,4-triazin-3(2H)-one     | 14510 | 4.838333 | 10 |  |

**Table S6** QSAR study of Dataset-2

| Ligand Name | QSAR Set | Activity (pKi) | # Factors | #                  |                  |
|-------------|----------|----------------|-----------|--------------------|------------------|
|             |          |                |           | Predicted Activity | Prediction Error |
| 50056999    | test     | 6.252          | 1         | 5.94542            | -0.3064          |
|             |          |                | 2         | 6.16716            | -0.08465         |
|             |          |                | 3         | 6.5233             | 0.271486         |
| 50029593    | test     | 6.456          | 1         | 5.9997             | -0.45623         |
|             |          |                | 2         | 6.22924            | -0.22669         |
|             |          |                | 3         | 6.59617            | 0.140234         |

|          |          |       |   |         |          |
|----------|----------|-------|---|---------|----------|
| 11639    | training | 6.081 | 1 | 5.77837 | -0.30255 |
|          |          |       | 2 | 6.43978 | 0.358859 |
|          |          |       | 3 | 6.19944 | 0.118521 |
| 50029616 | test     | 5.699 | 1 | 5.83917 | 0.140202 |
|          |          |       | 2 | 6.49389 | 0.794919 |
|          |          |       | 3 | 6.35792 | 0.658954 |
| 50072064 | training | 7.161 | 1 | 6.99964 | -0.16151 |
|          |          |       | 2 | 6.89043 | -0.27072 |
|          |          |       | 3 | 6.81494 | -0.34621 |
| 13063    | training | 6.06  | 1 | 5.81044 | -0.25004 |
|          |          |       | 2 | 6.45076 | 0.390277 |
|          |          |       | 3 | 6.15582 | 0.095335 |
| 50285227 | training | 6.602 | 1 | 5.8279  | -0.77416 |
|          |          |       | 2 | 6.49511 | -0.10695 |
|          |          |       | 3 | 6.3565  | -0.24556 |
| 50566911 | test     | 7.495 | 1 | 7.65283 | 0.157978 |
|          |          |       | 2 | 7.63803 | 0.143175 |
|          |          |       | 3 | 7.6332  | 0.138347 |
| 50566912 | training | 7.921 | 1 | 7.64435 | -0.27647 |
|          |          |       | 2 | 7.64607 | -0.27474 |
|          |          |       | 3 | 7.68693 | -0.23388 |
| 50566900 | training | 6.943 | 1 | 7.67167 | 0.728576 |
|          |          |       | 2 | 7.6392  | 0.696103 |
|          |          |       | 3 | 7.60253 | 0.65943  |
| 50566901 | training | 7.921 | 1 | 7.65607 | -0.26475 |
|          |          |       | 2 | 7.6472  | -0.27362 |
|          |          |       | 3 | 7.67321 | -0.24761 |
| 50566910 | test     | 8.523 | 1 | 7.63829 | -0.88459 |
|          |          |       | 2 | 7.60529 | -0.91759 |
|          |          |       | 3 | 7.62547 | -0.89741 |
| 22369    | training | 6.276 | 1 | 6.80279 | 0.527069 |
|          |          |       | 2 | 6.60042 | 0.324698 |

|          |          |       |   |         |          |
|----------|----------|-------|---|---------|----------|
|          |          |       | 3 | 6.33975 | 0.064024 |
| 50566913 | training | 7.721 | 1 | 7.66388 | -0.05736 |
|          |          |       | 2 | 7.67995 | -0.0413  |
|          |          |       | 3 | 7.7181  | -0.00314 |
| 50114414 | training | 4.835 | 1 | 5.53751 | 0.702453 |
|          |          |       | 2 | 5.16416 | 0.329102 |
|          |          |       | 3 | 4.75584 | -0.07922 |
| 50114416 | training | 4.832 | 1 | 5.60712 | 0.774731 |
|          |          |       | 2 | 5.33018 | 0.497792 |
|          |          |       | 3 | 5.0898  | 0.257416 |
| 50114415 | training | 4.832 | 1 | 5.60712 | 0.774731 |
|          |          |       | 2 | 5.33018 | 0.497792 |
|          |          |       | 3 | 5.0898  | 0.257416 |
| 50114417 | training | 4.83  | 1 | 5.58482 | 0.754792 |
|          |          |       | 2 | 5.27574 | 0.445705 |
|          |          |       | 3 | 4.97585 | 0.145822 |
| 198171   | training | 6.187 | 1 | 5.73182 | -0.45527 |
|          |          |       | 2 | 5.66877 | -0.51831 |
|          |          |       | 3 | 6.13505 | -0.05204 |
| 198174   | test     | 6.114 | 1 | 5.7765  | -0.33701 |
|          |          |       | 2 | 5.76725 | -0.34626 |
|          |          |       | 3 | 6.30364 | 0.190131 |
| 198172   | training | 6.201 | 1 | 5.71884 | -0.48182 |
|          |          |       | 2 | 5.63359 | -0.56707 |
|          |          |       | 3 | 6.03264 | -0.16802 |
| 198173   | training | 6.301 | 1 | 5.72824 | -0.57279 |
|          |          |       | 2 | 5.66365 | -0.63738 |
|          |          |       | 3 | 6.12918 | -0.17185 |
| 198175   | training | 6.018 | 1 | 5.76367 | -0.25406 |
|          |          |       | 2 | 5.73094 | -0.28678 |
|          |          |       | 3 | 6.19627 | 0.17854  |
| 198176   | training | 6.056 | 1 | 5.77364 | -0.28188 |

|          |          |       |   |         |          |
|----------|----------|-------|---|---------|----------|
|          |          |       | 2 | 5.76099 | -0.29453 |
|          |          |       | 3 | 6.2909  | 0.235383 |
| 50114413 | training | 4.838 | 1 | 5.48337 | 0.645034 |
|          |          |       | 2 | 5.0672  | 0.228865 |
|          |          |       | 3 | 4.63139 | -0.20694 |



**Table S7** Statistical parameters field-based QSAR model for COX-1 inhibition

| # PLS Factors | SD     | R <sup>2</sup> | R <sup>2</sup> CV | R <sup>2</sup> Scramble | Stability | F    | P        | RMSE | Q <sup>2</sup> | Pearson-r |
|---------------|--------|----------------|-------------------|-------------------------|-----------|------|----------|------|----------------|-----------|
| 1             | 0.6011 | 0.5528         | 0.3136            | 0.418                   | 0.175     | 17.3 | 0.000963 | 0.73 | 0.5476         | 0.4423    |
| 2             | 0.3495 | 0.8596         | 0.3277            | 0.5307                  | 0.243     | 39.8 | 2.87E-06 | 0.62 | 0.4584         | 0.6426    |
| 3             | 0.2891 | 0.9114         | 0.4975            | 0.7225                  | 0.233     | 41.1 | 1.37E-06 | 0.71 | 0.4669         | 0.5168    |

R<sup>2</sup> = correlation coefficient of experimentally observed and predicted activity of the training set; SD = standard deviation of regression; R<sup>2</sup> CV=cross-validated value (leave-one-out validation); F = variance ratio; p = statistical significance; Q<sup>2</sup> = value of R<sup>2</sup> of the test set; RMSE = root mean square error; Pearson's r = correlation coefficient of predicted and experimentally observed activity of the test set.

**Table S8** Contribution factors of field-based QSAR model for COX-1 inhibition

| # PLS Factors | Gaussian Steric | Gaussian Electrostatic | Gaussian Hydrophobic | Gaussian Hbond Acceptor | Gaussian Hbond Donor |
|---------------|-----------------|------------------------|----------------------|-------------------------|----------------------|
| 1             | 0.271           | 0.089                  | 0.238                | 0.218                   | 0.183                |
| 2             | 0.256           | 0.103                  | 0.206                | 0.233                   | 0.202                |
| 3             | 0.251           | 0.104                  | 0.208                | 0.236                   | 0.201                |

**Table S9** Statistical parameters of field-based QSAR model for COX-2 inhibition

| # PLS Factors | SD     | R <sup>2</sup> | R <sup>2</sup> CV | R <sup>2</sup> Scramble | Stability | F    | P        | RMSE | Q <sup>2</sup> | Pearson-r |
|---------------|--------|----------------|-------------------|-------------------------|-----------|------|----------|------|----------------|-----------|
| 1             | 0.5436 | 0.7277         | 0.6031            | 0.211                   | 0.978     | 42.8 | 6.83E-06 | 0.51 | 0.7941         | 0.9153    |
| 2             | 0.4382 | 0.8341         | 0.6928            | 0.405                   | 0.966     | 37.7 | 1.41E-06 | 0.51 | 0.7876         | 0.9027    |
| 3             | 0.2729 | 0.9400         | 0.8404            | 0.5672                  | 0.958     | 73.1 | 8.61E-09 | 0.45 | 0.8398         | 0.9357    |

R<sup>2</sup> = correlation coefficient of experimentally observed and predicted activity of the training set; SD = standard deviation of regression; R<sup>2</sup> CV=cross-validated value (leave-one-out validation); F = variance ratio; p = statistical significance; Q<sup>2</sup> = value of R<sup>2</sup> of the test set; RMSE = root mean square error; Pearson's r = correlation coefficient of predicted and experimentally observed activity of the test set.

**Table S10** Contribution factors of field-based QSAR model for COX-2 inhibition

| # Factors | Gaussian Steric | Gaussian Electrostatic | Gaussian Hydrophobic | Gaussian Hbond Acceptor | Gaussian Hbond Donor |
|-----------|-----------------|------------------------|----------------------|-------------------------|----------------------|
| 1         | 0.31            | 0.116                  | 0.175                | 0.291                   | 0.108                |
| 2         | 0.317           | 0.116                  | 0.178                | 0.277                   | 0.112                |

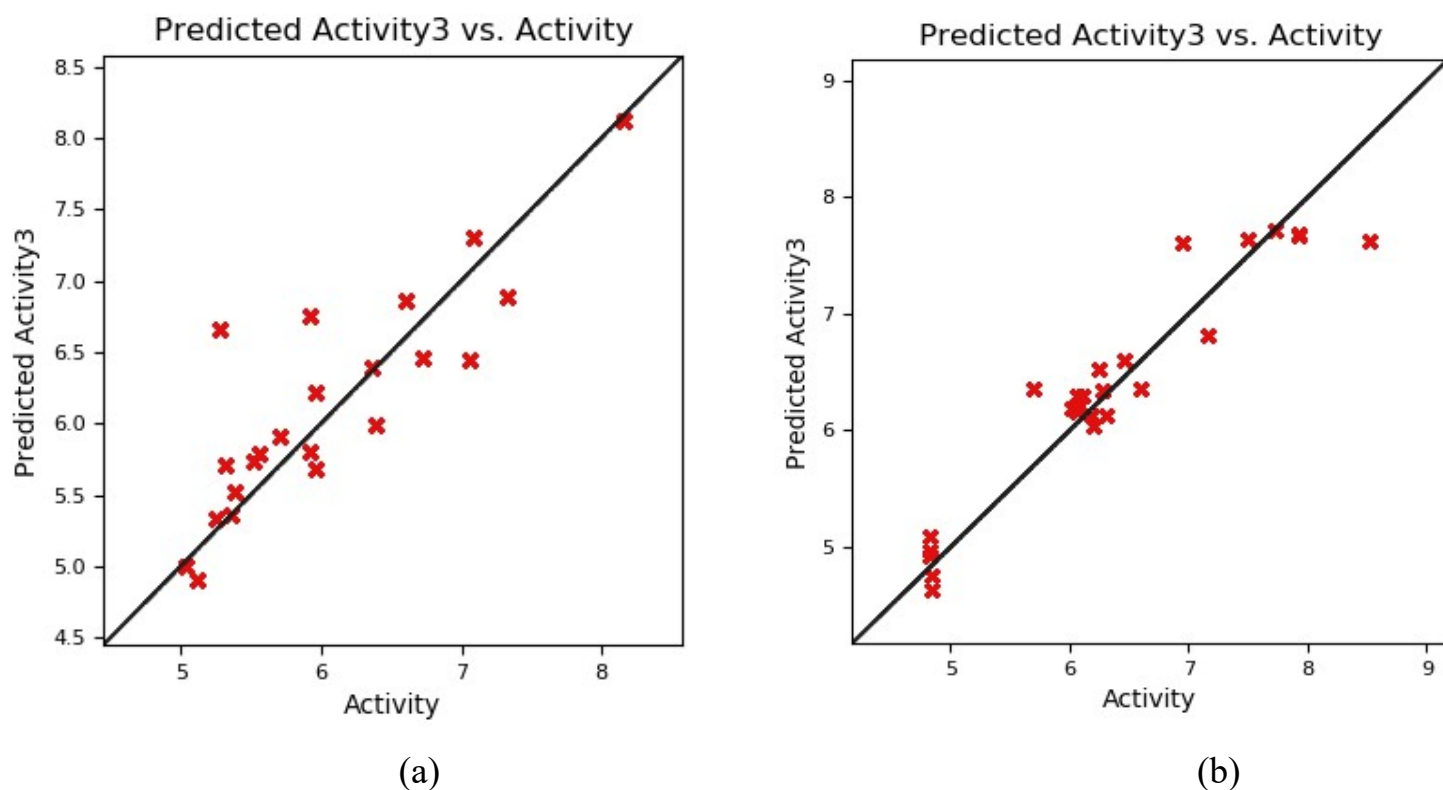

**Figure S6:** Scatter plot for the comparison of actual versus predicted activity using the field-based QSAR model (PLS 3). The scatter plots depict the results for (a) the training and test set in the context of COX-1 inhibition, alongside (b) the training and test set for COX-2 inhibition.

#### References

- [1] T. D. Warner, F. Giuliano, I. Vojnovic, A. Bukasa, J. A. Mitchell, and J. R. Vane, 'Nonsteroid drug selectivities for cyclo-oxygenase-1 rather than cyclo-oxygenase-2 are associated with human gastrointestinal toxicity: a full in vitro analysis.', *Proc Natl Acad Sci U S A*, vol. 96, no. 13, pp. 7563–8, Jun. 1999, doi: 10.1073/pnas.96.13.7563.
- [2] D. J. Cochrane, B. Jarvis, and G. M. Keating, 'Etoricoxib.', *Drugs*, vol. 62, no. 18, pp. 2637–51; discussion 2652-3, 2002, doi: 10.2165/00003495-200262180-00006.
- [3] B. Cryer and M. Feldman, 'Cyclooxygenase-1 and cyclooxygenase-2 selectivity of widely used nonsteroidal anti-inflammatory drugs.', *Am J Med*, vol. 104, no. 5, pp. 413–21, May 1998, doi: 10.1016/s0002-9343(98)00091-6.
- [4] M. R. Weir, R. S. Sperling, A. Reicin, and B. J. Gertz, 'Selective COX-2 inhibition and cardiovascular effects: a review of the rofecoxib development program.', *Am Heart J*, vol. 146, no. 4, pp. 591–604, Oct. 2003, doi: 10.1016/S0002-8703(03)00398-3.
- [5] B. Cryer and M. Feldman, 'Cyclooxygenase-1 and cyclooxygenase-2 selectivity of widely used nonsteroidal anti-inflammatory drugs.', *Am J Med*, vol. 104, no. 5, pp. 413–21, May 1998, doi: 10.1016/s0002-9343(98)00091-6.

- [6] D. Riendeau et al., 'Etoricoxib (MK-0663): preclinical profile and comparison with other agents that selectively inhibit cyclooxygenase-2.', *J Pharmacol Exp Ther*, vol. 296, no. 2, pp. 558–66, Feb. 2001, [Online]. Available: <http://www.ncbi.nlm.nih.gov/pubmed/11160644>
- [7] C. C. Chan et al., 'Rofecoxib [Vioxx, MK-0966; 4-(4'-methylsulfonylphenyl)-3-phenyl-2-(5H)-furanone]: a potent and orally active cyclooxygenase-2 inhibitor. Pharmacological and biochemical profiles.', *J Pharmacol Exp Ther*, vol. 290, no. 2, pp. 551–60, Aug. 1999, [Online]. Available: <http://www.ncbi.nlm.nih.gov/pubmed/10411562>
- [8] B. Cryer and M. Feldman, 'Cyclooxygenase-1 and cyclooxygenase-2 selectivity of widely used nonsteroidal anti-inflammatory drugs.', *Am J Med*, vol. 104, no. 5, pp. 413–21, May 1998, doi: 10.1016/s0002-9343(98)00091-6.
- [9] Z. Zhang et al., 'Gut-Restricted Selective Cyclooxygenase-2 (COX-2) Inhibitors for Chemoprevention of Colorectal Cancer.', *J Med Chem*, vol. 64, no. 15, pp. 11570–11596, Aug. 2021, doi: 10.1021/acs.jmedchem.1c00890.
- [10] Z. Chen et al., 'The Repertoire of Small-Molecule PET Probes for Neuroinflammation Imaging: Challenges and Opportunities beyond TSPO.', *J Med Chem*, vol. 64, no. 24, pp. 17656–17689, Dec. 2021, doi: 10.1021/acs.jmedchem.1c01571.
- [11] A. G. Banerjee, N. Das, S. A. Shengule, R. S. Srivastava, and S. K. Shrivastava, 'Synthesis, characterization, evaluation and molecular dynamics studies of 5, 6-diphenyl-1,2,4-triazin-3(2H)-one derivatives bearing 5-substituted 1,3,4-oxadiazole as potential anti-inflammatory and analgesic agents.', *Eur J Med Chem*, vol. 101, pp. 81–95, Aug. 2015, doi: 10.1016/j.ejmech.2015.06.020.
- [12] A. G. Banerjee, N. Das, S. A. Shengule, P. A. Sharma, R. S. Srivastava, and S. K. Shrivastava, 'Design, synthesis, evaluation and molecular modelling studies of some novel 5,6-diphenyl-1,2,4-triazin-3(2H)-ones bearing five-member heterocyclic moieties as potential COX-2 inhibitors: A hybrid pharmacophore approach.', *Bioorg Chem*, vol. 69, pp. 102–120, Dec. 2016, doi: 10.1016/j.bioorg.2016.10.003.
